# Supplementary material for: Comparative Analysis of Bisexual and Parthenogenetic Populations in Haemaphysalis Longicornis
Source: MDPI journal article supplement (doi:10.3390/microorganisms12040823), 2024-04-19
Supplement: s1 [file s1]

Supplementary Materials:

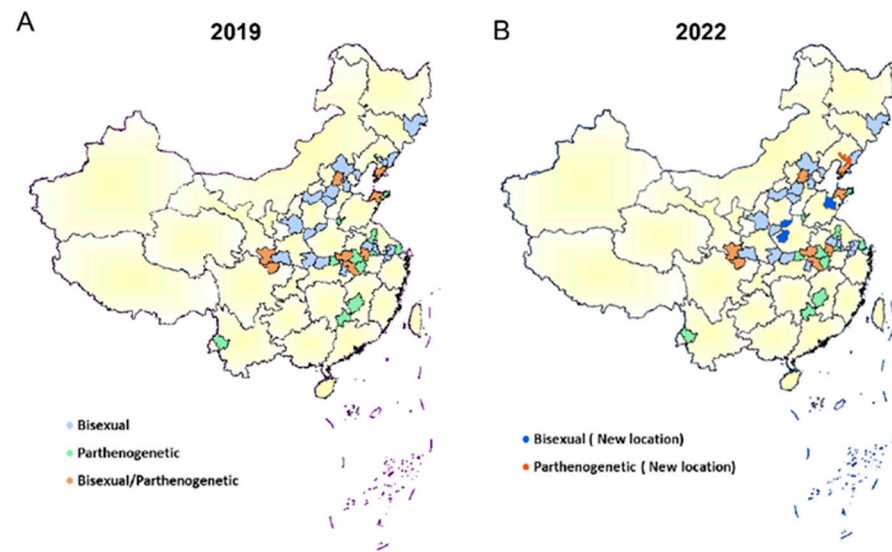

**Figure S1.** Geographical distribution of bisexual and parthenogenetic *Haemaphysalis longicornis* collected in China from 2019 to 2022. **(A)** Distribution of bisexual and parthenogenetic *H. longicornis* in China in 2019. Green areas indicate parthenogenetic *H. longicornis*, blue areas indicate bisexual *H. longicornis*, brown areas indicate both bisexual and parthenogenetic *H. longicornis*. **(B)** Distribution of bisexual and parthenogenetic *H. longicornis* in China in 2022. Orange areas indicate newly discovered parthenogenetic *H. longicornis*, dark blue areas indicate newly discovered bisexual *H. longicornis* relative to 2019.
